# Supplementary material for: A high-efficiency NiFeSe4/NiSe2 bifunctional electrocatalyst with outstanding oxygen evolution reaction and overall water splitting performance
Source: Royal Society of Chemistry journal article supplement (doi:10.1039/d3ta06701g), 2023-12-07
Supplement: d3ta06701g1.pdf [file d3ta06701g1.pdf]

## Supporting Information

### **High-efficiency NiFeSe<sub>4</sub>/NiSe<sub>2</sub> bifunctional electrocatalyst with outstanding oxygen evolution reaction and overall water splitting performance**

Lan Mu, Shipeng Qiu, Gang Zhao\*, Baojie zhang, Wenbo Liao, Ning Zhao, Xijin Xu\*

School of Physics and Technology, University of Jinan, Jinan 250022, P. R. China

\* Corresponding address: [sps\\_zhaog@ujn.edu.cn](mailto:sps_zhaog@ujn.edu.cn); [sps\\_xuxj@ujn.edu.cn](mailto:sps_xuxj@ujn.edu.cn)

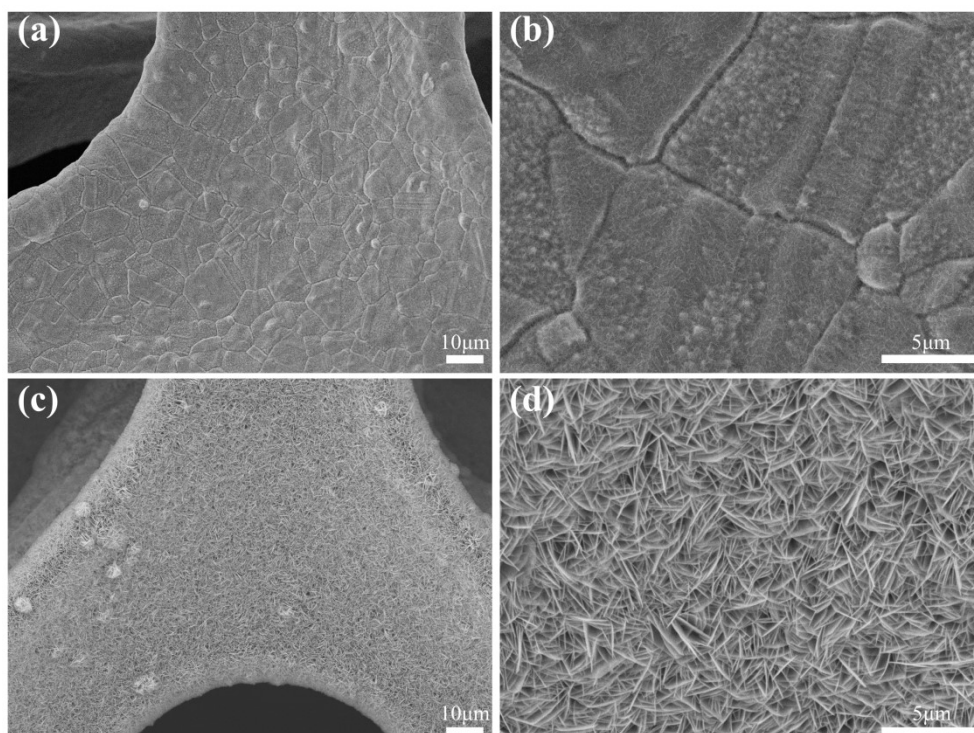

**Figure S1** SEM image of catalyst (a-b) nickel foam; (c-d) NiFe-LDH.

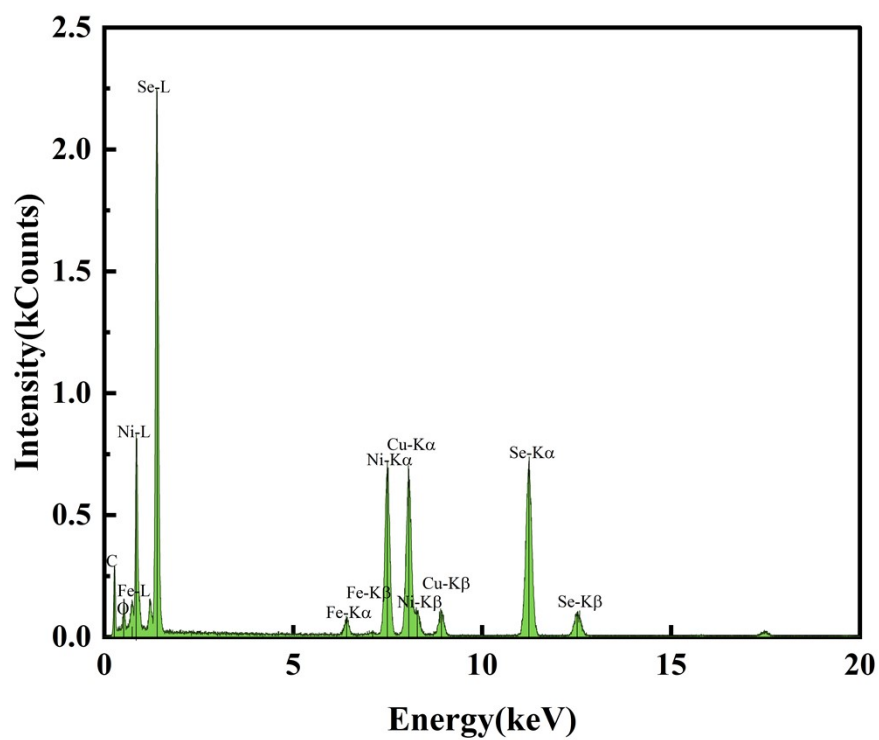

**Figure S2** Energy dispersion spectrum of NiFeSe<sub>4</sub>/NiSe<sub>2</sub>-8h.

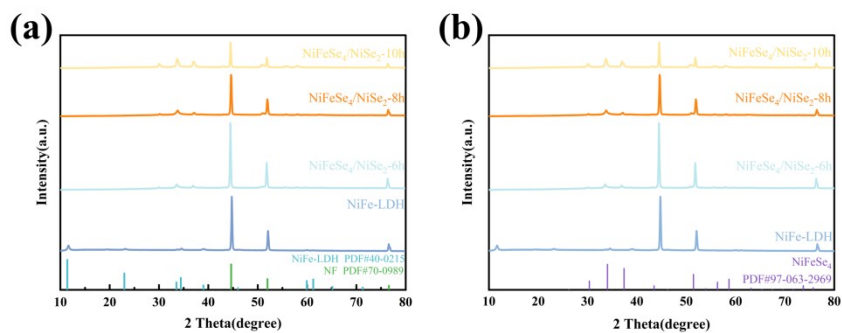

**Figure S3** XRD patterns of NiFe-LDH, NiFeSe<sub>4</sub>/NiSe<sub>2</sub>-6h, NiFeSe<sub>4</sub>/NiSe<sub>2</sub>-8h and NiFeSe<sub>4</sub>/NiSe<sub>2</sub>-10h.

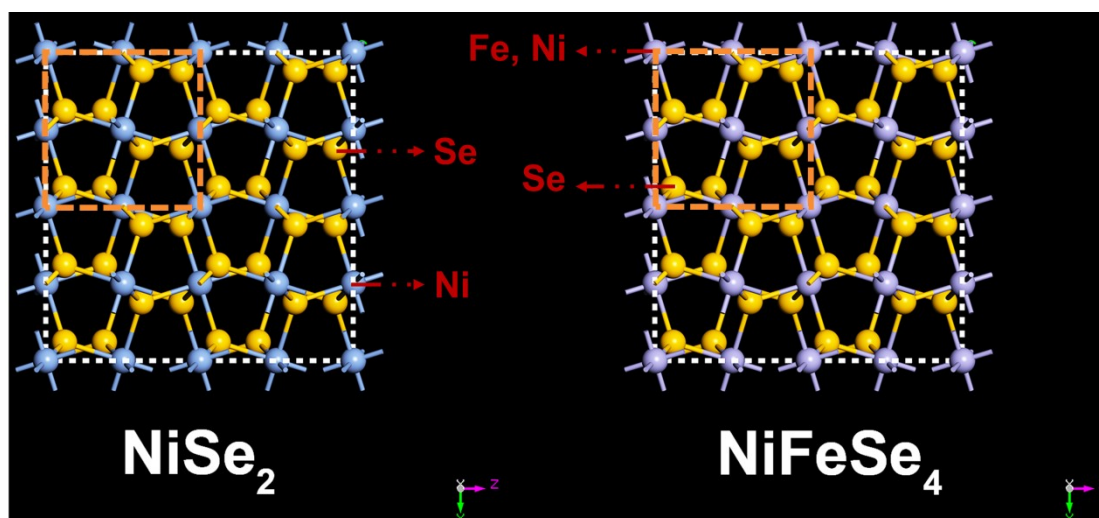

**Figure S4** Crystal structure of NiSe<sub>2</sub> and NiFeSe<sub>4</sub>.

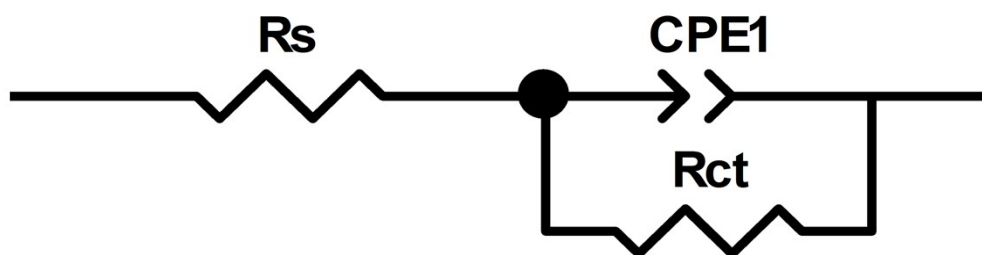

**Figure S5** Equivalent Circuit Model (ECM): Randall circuit model.

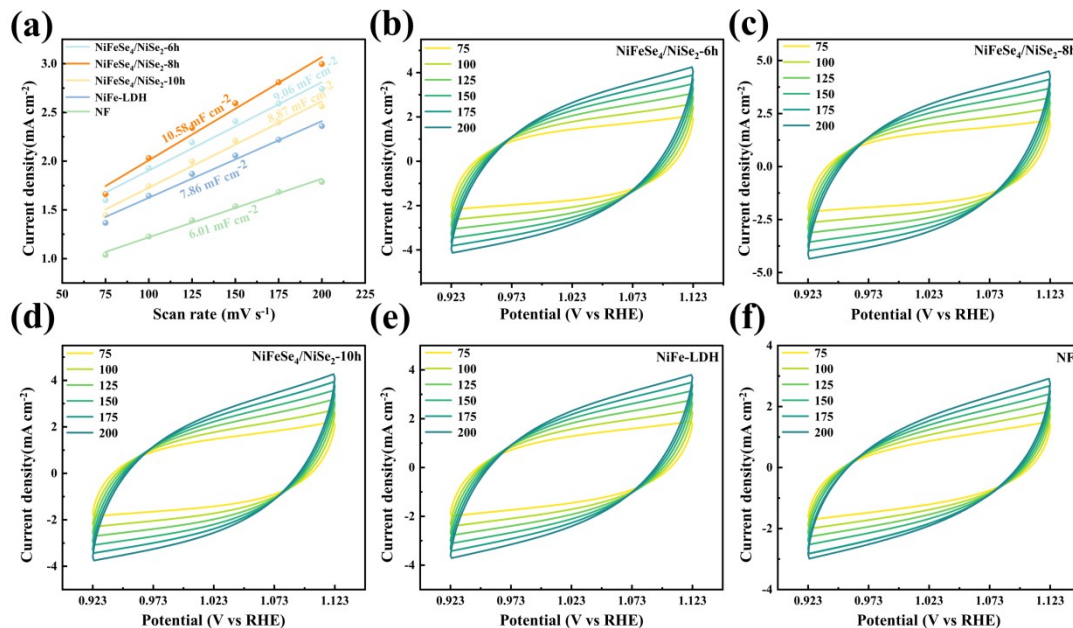

**Figure S6** Shows the double-layer capacitors of NiFeSe<sub>4</sub>/NiSe<sub>2</sub>-6h, NiFeSe<sub>4</sub>/NiSe<sub>2</sub>-8h, NiFeSe<sub>4</sub>/NiSe<sub>2</sub>-10h, NiFe-LDH and NF, respectively.

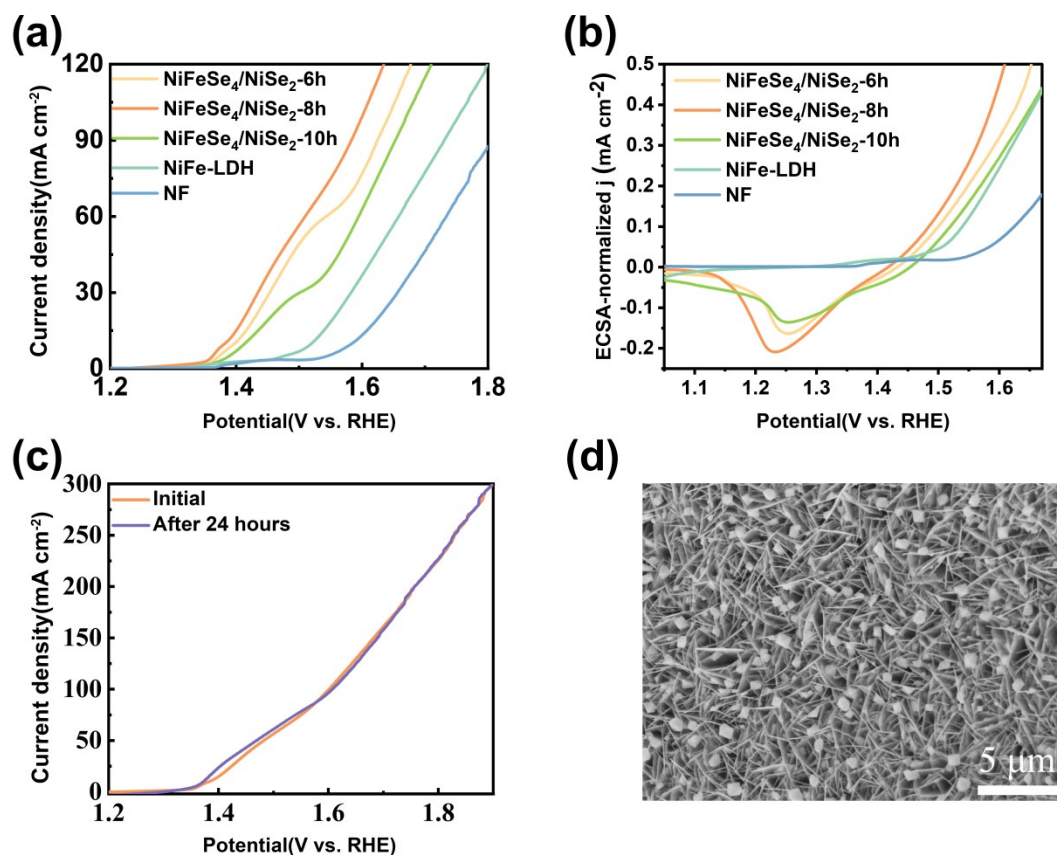

**Figure S7** (a) LSV curves of forward sweep; (b) normalization of current density using ECSA; (c) performance comparison of NiFeSe<sub>4</sub>/NiSe<sub>2</sub>-8h before and after stability test; (d) morphology of NiFeSe<sub>4</sub>/NiSe<sub>2</sub>-8h material after OER stability test.

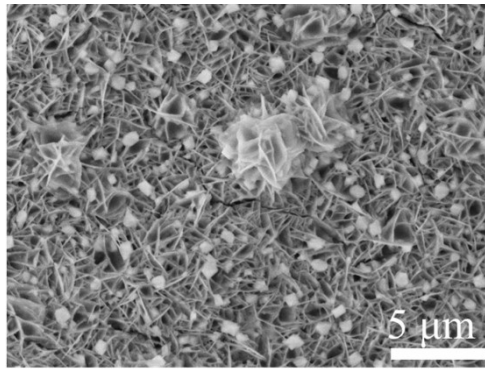

**Figure S8** Morphology of NiFeSe<sub>4</sub>/NiSe<sub>2</sub>-8h material after HER stability test

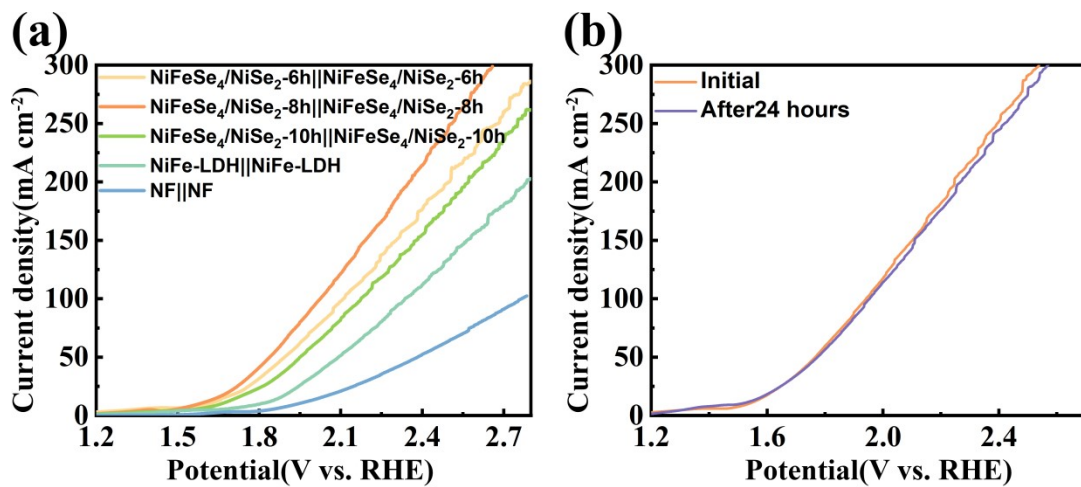

**Figure S9** (a) LSV diagrams of NF, NiFe, NiFeSe<sub>4</sub>/NiSe<sub>2</sub>-8h, NiFeSe<sub>4</sub>/NiSe<sub>2</sub>-8h and NiFeSe<sub>4</sub>/NiSe<sub>2</sub>-8h; (b) performance comparison of NiFeSe<sub>4</sub>/NiSe<sub>2</sub>-8h before and after the total water splitting stability test.

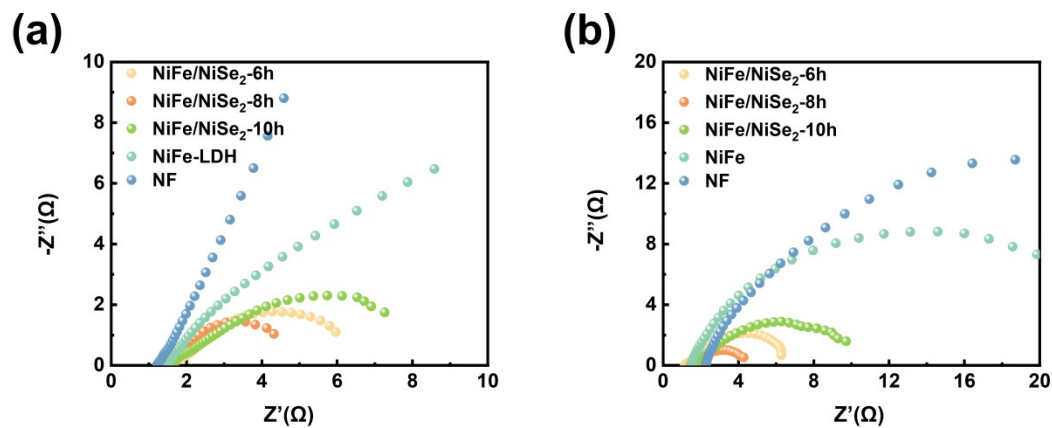

**Figure S10:** (a) OER impedance diagram without fitting; (b) HER impedance diagram without fitting



**Table S1** Energy dispersive X-ray spectrum analysis of NiFeSe<sub>4</sub>/NiSe<sub>2</sub>-8h.

| element | line style | atomic percent | weight percentage | Mass Error (%) Fit |
|---------|------------|----------------|-------------------|--------------------|
| Fe      | K          | 3.29           | 2.59              | 0.71               |
| Ni      | K          | 36.78          | 30.52             | 0.24               |
| Se      | K          | 59.93          | 66.89             | 0.37               |
| total   |            | 100            | 100               |                    |

**Table S2** Reaction impedances of OER and HER for NiFeSe<sub>4</sub>/NiSe<sub>2</sub>-6h, NiFeSe<sub>4</sub>/NiSe<sub>2</sub>-8h, NiFeSe<sub>4</sub>/NiSe<sub>2</sub>-10h, NiFe-LDH and NF.

| Catalytic materials                         | OER                            |       |                                             | HER    |                                |       |                                             |        |
|---------------------------------------------|--------------------------------|-------|---------------------------------------------|--------|--------------------------------|-------|---------------------------------------------|--------|
|                                             | R <sub>s</sub> :<br>resistance | Ohmic | R <sub>ct</sub> :<br>transfer<br>resistance | Charge | R <sub>s</sub> :<br>resistance | Ohmic | R <sub>ct</sub> :<br>transfer<br>resistance | Charge |
| NiFeSe <sub>4</sub> /NiSe <sub>2</sub> -6h  |                                | 1.859 |                                             | 5.1    |                                | 1.212 |                                             | 6.137  |
| NiFeSe <sub>4</sub> /NiSe <sub>2</sub> -8h  |                                | 1.714 |                                             | 3.279  |                                | 1.542 |                                             | 3.281  |
| NiFeSe <sub>4</sub> /NiSe <sub>2</sub> -10h |                                | 1.789 |                                             | 8.652  |                                | 1.868 |                                             | 8.841  |
| NiFe-LDH                                    |                                | 1.45  |                                             | 25.25  |                                | 1.449 |                                             | 24.18  |
| NF                                          |                                | 1.286 |                                             | 979.9  |                                | 2.148 |                                             | 35.49  |

**Table S3** overall water splitting performance comparison.

| Catalyst                                                                 | Current density<br>(mA cm <sup>-2</sup> ) | Potential(V) | Reference |
|--------------------------------------------------------------------------|-------------------------------------------|--------------|-----------|
| NiFeSe <sub>4</sub> /NiSe <sub>2</sub> -8h                               | 10                                        | 1.569        | This work |
| Ni <sub>1</sub> Fe <sub>10</sub> -LDH@Ni <sub>3</sub> S <sub>2</sub> /NF | 10                                        | 1.650        | 1         |
| (Ni,Co) <sub>0.85</sub> Se NSAS                                          | 10                                        | 1.650        | 2         |
| Fe <sub>3</sub> O <sub>4</sub> /NiFe LDH/Fe <sub>3</sub> O <sub>4</sub>  | 10                                        | 1.648        | 3         |
| NiSe <sub>2</sub>                                                        | 10                                        | 1.640        | 4         |
| NiCo <sub>2</sub> S <sub>4</sub> @NiFe-LDH/NF                            | 10                                        | 1.600        | 5         |
| NiWO <sub>4</sub> @NiSe <sub>2</sub> /NF                                 | 10                                        | 1.600        | 6         |
| CoFe/NiFe-LDH                                                            | 10                                        | 1.590        | 7         |
| Cr-NiSe <sub>2</sub> -N/NF                                               | 10                                        | 1.590        | 8         |
| Co <sub>9</sub> S <sub>8</sub> @NiFe-LDH                                 | 10                                        | 1.585        | 9         |

## References

1. L. Ren, C. Wang, W. Li, R. Dong, H. Sun, N. Liu and B. Geng, *Electrochimica Acta*, 2019, **318**, 42-50.
2. K. Xiao, L. Zhou, M. Shao and M. Wei, *Journal of Materials Chemistry A*, 2018, **6**, 7585-7591.
3. X. Zhang, Y. Qiu, Q. Li, F. Liu, L. Cui, C. Li and J. Liu, *Journal of Alloys and Compounds*, 2023, **932**, 167612.
4. J. Zhang, Y. Wang, C. Zhang, H. Gao, L. Lv, L. Han and Z. Zhang, *ACS Sustainable Chemistry & Engineering*, 2018, **6**, 2231-2239.
5. J. Liu, J. Wang, B. Zhang, Y. Ruan, L. Lv, X. Ji, K. Xu, L. Miao and J. Jiang, *ACS Applied Materials & Interfaces*, 2017, **9**, 15364-15372.
6. J. Li, X. Du and X. Zhang, *Journal of Alloys and Compounds*, 2023, **951**, 169941.
7. R. Yang, Y. Zhou, Y. Xing, D. Li, D. Jiang, M. Chen, W. Shi and S. Yuan, *Applied Catalysis B: Environmental*, 2019, **253**, 131-139.
8. X. Zheng, S. Sun, Y. Liu, D. Li, D. Tian, J. Zhu and D. Jiang, *Applied Surface Science*, 2023, **609**, 155406.
9. Y. Lu, C. Liu, Y. Xing, Q. Xu, A. M. S. Hossain, D. Jiang, D. Li and J. Zhu, *Journal of Colloid and Interface Science*, 2021, **604**, 680-690.
